# Supplementary material
Source: PubMed Central journal article supplement (PMC8005315)
Supplement: NIHMS1678087-supplement-Supplemental_Tables_1_and_2.pdf [file NIHMS1678087-supplement-Supplemental_Tables_1_and_2.pdf]

## SUPPLEMENTAL MATERIAL

Supplemental Table 1: Coding algorithms for outcomes and comorbidities

|                                               | Operationalized definitions                                                                |                                                                                                         |                            |                  |                  |
|-----------------------------------------------|--------------------------------------------------------------------------------------------|---------------------------------------------------------------------------------------------------------|----------------------------|------------------|------------------|
|                                               | ICD-9 diagnosis                                                                            | ICD-10 diagnosis                                                                                        | ICD-9 procedure            | ICD-10 procedure | Medication class |
| Heart failure (any)                           | 428.x 402.01<br>402.11 402.91<br>404.01 404.03<br>404.11 404.13<br>404.91 404.93<br>398.91 | I50.x I11.0<br>I13.0 I13.2<br>I09.81                                                                    | N/A                        | N/A              | N/A              |
| Cardiovascular disease (CEVD/Stroke, CAD, MI) | 362.34 430.x-438.x, 414.0<br>410.x 412<br>414.8 414.9, 410.x 412.x                         | G45.x G46.x<br>H34.0 I60.x-<br>I69.x, I25.x<br>I70.0 I24.x,<br>I21.x I22.x<br>I25.2x                    | 36.1                       | N/A              | N/A              |
| Hyperkalemia                                  | 276.7                                                                                      | E87.5                                                                                                   | N/A                        | N/A              | N/A              |
| Peripheral Artery Disease                     | 443.9 440.2x-440.4x 707.1x<br>785.4                                                        | I70.2x I73.x                                                                                            | 38.18 39.50<br>39.25 39.29 | I73.9            | N/A              |
| Diabetes                                      | 250.x 357.2<br>362.0x 366.41                                                               | E08.x-E11.x<br>E13.x                                                                                    | N/A                        | N/A              | Diabetes drug    |
| Cancer                                        | 140.x-172.x<br>174.x-208.x<br>238.6                                                        | C00.x-C26.x<br>C30.x-C34.x<br>C37.x-C41.x<br>C43.x C45.x-<br>C58.x C60.x-<br>C85.x C88.x<br>C90.x-C97.x | N/A                        | N/A              | N/A              |
| Cirrhosis                                     | 571.2 571.5<br>571.6                                                                       | K74.3 -<br>K74.6x                                                                                       | N/A                        | N/A              | N/A              |
| Ascites                                       | 789.5x                                                                                     | R18.x                                                                                                   | N/A                        | N/A              | N/A              |
| Acute kidney injury                           | 584.9                                                                                      | N17.9                                                                                                   | N/A                        | N/A              | N/A              |
| Atrial fibrillation                           | 427.3x                                                                                     | I48.x                                                                                                   | N/A                        | N/A              | N/A              |
| Proteinuria                                   | 791.0                                                                                      | R80.x                                                                                                   | N/A                        | N/A              | N/A              |

Supplemental Table 1 Key: International Classification of Diseases (ICD); cerebrovascular disease (CEVD); coronary artery disease (CAD); myocardial infarction (MI)

Supplemental Table 2: Study population used for intention-to-treat analysis, pooled and stratified by cohort “trial” years

|                                 | Cohort "trial" years using ITT design |                  |                  |                  |                | P-value |
|---------------------------------|---------------------------------------|------------------|------------------|------------------|----------------|---------|
|                                 | Cohort 2004-2006                      | Cohort 2007-2009 | Cohort 2010-2012 | Cohort 2013-2016 | Pooled         |         |
| <b>N (total)</b>                | 2,104 (8.7%)                          | 4,876 (20.2%)    | 6,854 (28.4%)    | 10,293 (42.7%)   | 24,127         |         |
| <b>Female</b>                   | 1,068 (50.8%)                         | 2,529 (51.9%)    | 3,531 (51.5%)    | 5,371 (52.2%)    | 12,499 (51.8%) | .30     |
| <b>Non-white</b>                | 34 (1.6%)                             | 98 (2.0%)        | 150 (2.2%)       | 269 (2.6%)       | 551 (2.3%)     | <.001   |
| <b>Age (mean), years</b>        | 73.7 (12.3)                           | 73.6 (12.4)      | 73.8 (12.5)      | 73.9 (13.0)      | 73.8 (12.7)    | .15     |
| <b>CCI (mean)</b>               | 6.7 (2.5)                             | 7.2 (2.7)        | 7.5 (2.8)        | 7.8 (3.0)        | 7.5 (2.8)      | <.001   |
| <b>Baseline labs</b>            |                                       |                  |                  |                  |                |         |
| K (mean), mg/dL                 | 4.3 (0.4)                             | 4.2 (0.4)        | 4.2 (0.4)        | 4.2 (0.4)        | 4.2 (0.4)      | <.001   |
| SCr (mean), mEq/L               | 1.2 (0.5)                             | 1.2 (0.6)        | 1.2 (0.6)        | 1.2 (0.6)        | 1.2 (0.6)      | <.001   |
| <b>Kidney function</b>          |                                       |                  |                  |                  |                |         |
| eGFR (mean)                     | 61.8 (22.9)                           | 61.4 (23.6)      | 60.4 (23.8)      | 59.6 (23.7)      | 60.4 (23.6)    | <.001   |
| ≥90 mL/min/1.73m <sup>2</sup>   | 275 (13.1%)                           | 646 (13.3%)      | 907 (13.2%)      | 1,277 (12.4%)    | 3,105 (12.9%)  | <.001   |
| 60-89 mL/min/1.73m <sup>2</sup> | 819 (38.9%)                           | 1,830 (37.5%)    | 2,472 (36.1%)    | 3,635 (35.3%)    | 8,756 (36.3%)  | .15     |
| 30-59 mL/min/1.73m <sup>2</sup> | 839 (39.9%)                           | 1,971 (40.4%)    | 2,823 (41.2%)    | 4,368 (42.4%)    | 10,001 (41.5%) | <.001   |
| <30 mL/min/1.73m <sup>2</sup>   | 171 (8.1%)                            | 429 (8.8%)       | 652 (9.5%)       | 1,013 (9.8%)     | 2,265 (9.4%)   | <.001   |
| <b>Comorbidities</b>            |                                       |                  |                  |                  |                |         |
| CVD                             | 1,412 (67.1%)                         | 3,388 (69.5%)    | 4,877 (71.2%)    | 7,236 (70.3%)    | 16,913 (70.1%) | .01     |
| Hyperkalemia                    | 78 (3.7%)                             | 284 (5.8%)       | 446 (6.5%)       | 869 (8.4%)       | 1,677 (7.0%)   | <.001   |
| PAD                             | 410 (19.5%)                           | 1,141 (23.4%)    | 1,665 (24.3%)    | 2,634 (25.6%)    | 5,850 (24.2%)  | <.001   |
| Diabetes                        | 923 (43.9%)                           | 2,322 (47.6%)    | 3,423 (49.9%)    | 4,996 (48.5%)    | 11,664 (48.3%) | <.001   |
| Cancer                          | 401 (19.1%)                           | 928 (19.0%)      | 1,318 (19.2%)    | 2,078 (20.2%)    | 4,725 (19.6%)  | .07     |
| Cirrhosis                       | 27 (1.3%)                             | 60 (1.2%)        | 114 (1.7%)       | 209 (2.0%)       | 410 (1.7%)     | <.001   |
| Ascites                         | 42 (2.0%)                             | 110 (2.3%)       | 148 (2.2%)       | 214 (2.1%)       | 514 (2.1%)     | .79     |
| AKI                             | 170 (8.1%)                            | 694 (14.2%)      | 1,426 (20.8%)    | 2,814 (27.3%)    | 51,04 (21.2%)  | <.001   |
| Atrial fibrillation             | 762 (36.2%)                           | 1,926 (39.5%)    | 2,947 (43.0%)    | 4,709 (45.7%)    | 10,344 (42.9%) | <.001   |
| Proteinuria                     | 109 (5.2%)                            | 292 (6.0%)       | 479 (7.0%)       | 772 (7.5%)       | 1,652 (6.8%)   | <.001   |
| <b>Medications</b>              |                                       |                  |                  |                  |                |         |
| ACEi or ARB                     | 1,684 (80.0%)                         | 3,984 (80.7%)    | 5,520 (80.5%)    | 7,517 (73.0%)    | 18,705 (77.6%) | <.001   |
| Other antihypertensive          | 1,815 (86.3%)                         | 4,354 (89.3%)    | 6,230 (90.9%)    | 9,150 (88.9%)    | 21,549 (89.3%) | .07     |
| Anticoagulants                  | 1,124 (53.4%)                         | 2,888 (59.2%)    | 4,244 (61.9%)    | 6,143 (59.7%)    | 14,399 (59.7%) | <.001   |
| Arrhythmic                      | 399 (19.0%)                           | 1,087 (22.3%)    | 1,590 (23.2%)    | 2,083 (20.2%)    | 5,159 (21.4%)  | .34     |
| Cardiac glycoside               | 533 (25.3%)                           | 1,130 (23.2%)    | 1,405 (20.5%)    | 1,576 (15.3%)    | 4,644 (19.2%)  | <.001   |
| Statin                          | 1,308 (62.2%)                         | 3,286 (67.4%)    | 4,770 (69.6%)    | 6,703 (65.1%)    | 16,067 (66.6%) | .95     |
| Thiazide diuretic               | 777 (36.9%)                           | 1,654 (33.9%)    | 2,142 (31.3%)    | 2,546 (24.7%)    | 7,119 (29.5%)  | <.001   |
| Other k-sparing diuretic        | 69 (3.3%)                             | 151 (3.1%)       | 205 (3.0%)       | 227 (2.2%)       | 652 (2.7%)     | <.001   |

Supplemental Table 2 Key: Index date ( $T_0$ ); Charlson Comorbidity Index (CCI); serum potassium (K); serum creatinine (SCr); estimated glomerular filtration rate (eGFR); heart failure (HF); cardiovascular disease (CVD); peripheral artery disease (PAD); acute kidney injury (AKI); angiotensin-converting-enzyme inhibitor (ACEi); angiotensin II receptor blockers (ARB); potassium-sparing (k-sparing); for mean values, parentheses designate standard deviation; time with HF is the mean time between initial HF diagnosis and first loop prescription after the initial HF diagnosis; proteinuria was defined using diagnosis codes; CVD is a composite category including cerebrovascular disease/stroke, coronary artery disease, and myocardial infarction.
